# Supplementary material for: Prediction of Future Lake Water Availability Using SWAT and Support Vector Regression (SVR)
Source: MDPI journal article supplement (doi:10.3390/su14126974), 2022-06-07
Supplement: s1 [file s1]

## Supplementary Material

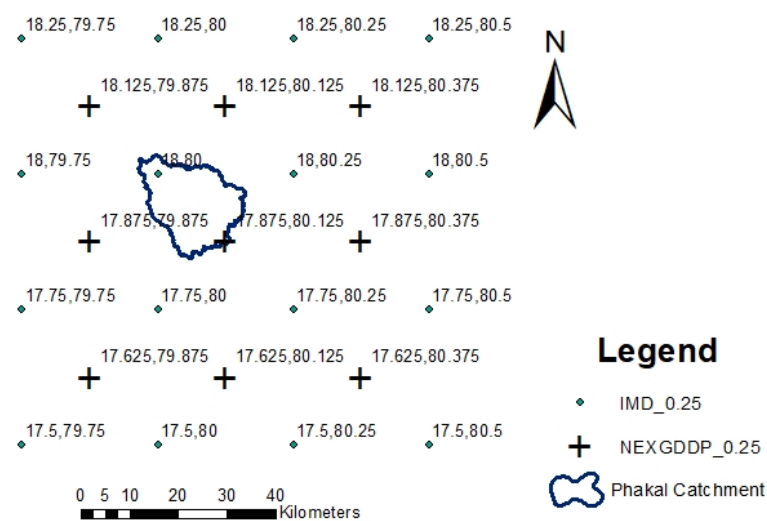

**Figure S1.** Map showing the NEX-GDDP and IMD grid points considered in the study.

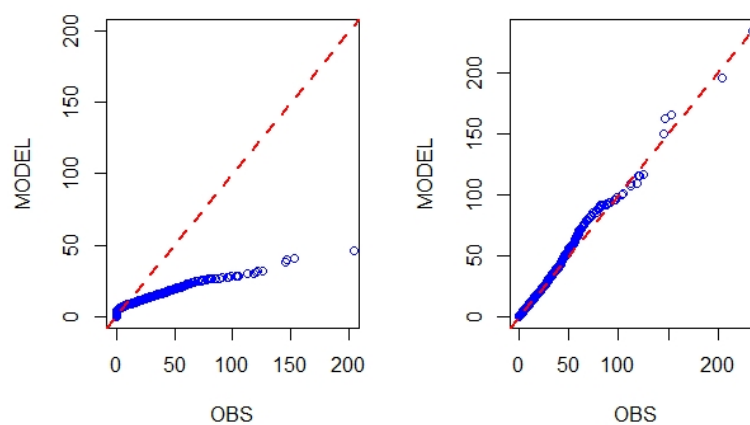

**Figure S2.** Quantile plots showing the results before and after bias correction for precipitation (a) Before bias correction. (b) After bias correction.
